# Supplementary material for: Benzenesulfonamides Incorporating Hydantoin Moieties Effectively Inhibit Eukaryoticand Human Carbonic Anhydrases
Source: MDPI journal article supplement (doi:10.3390/ijms232214115), 2022-11-15

# Benzenesulfonamides incorporating hydantoin moieties effectively inhibit eukaryotic and human carbonic anhydrases

Morteza Abdoli<sup>1</sup>, Viviana De Luca<sup>2</sup>, Clemente Capasso<sup>2</sup>, Claudiu T. Supuran<sup>\*,3</sup> and Raivis Žalubovskis<sup>\*,1,4</sup>

<sup>1</sup> Institute of Technology of Organic Chemistry, Faculty of Materials Science and Applied Chemistry, Riga Technical University, P. Valdenaiela 3, LV-1048 Riga, Latvia

<sup>2</sup> Department of Biology, Agriculture and Food Sciences, Institute of Biosciences and Bioresources, Via Pietro Castellino 111, 80131 Napoli, Italy

<sup>3</sup> NEUROFARBA Department, Pharmaceutical and Nutraceutical Section, University of Florence, Via Ugo Schiff 6, 50019 Florence, Italy

<sup>4</sup> Latvian Institute of Organic Synthesis, Aizkraukles 21, LV-1006, Riga, Latvia

\* Correspondence: claudiu.supuran@unifi.it (C.T.S.); raivis@osi.lv (R.Ž.)

\* CONTACT Raivis Žalubovskis raivis@osi.lv Latvian Institute of Organic Synthesis, 21 Aizkraukles Str, Riga, LV-1006, Latvia; Claudiu T. Supuran claudiu.supuran@unifi.it Dipartimento Neurofarba, Sezione di Scienze Farmaceutiche e Nutraceutiche, Universitàdegli Studi di Firenze, Sesto Fiorentino, Florence, Italy

## SUPPORTING INFORMATION

6

-11.4022

7.8587  
7.8307  
7.8154  
7.7864  
-7.3413

-4.5169

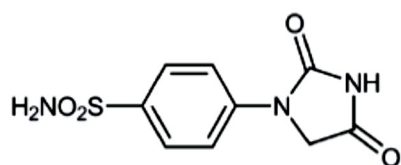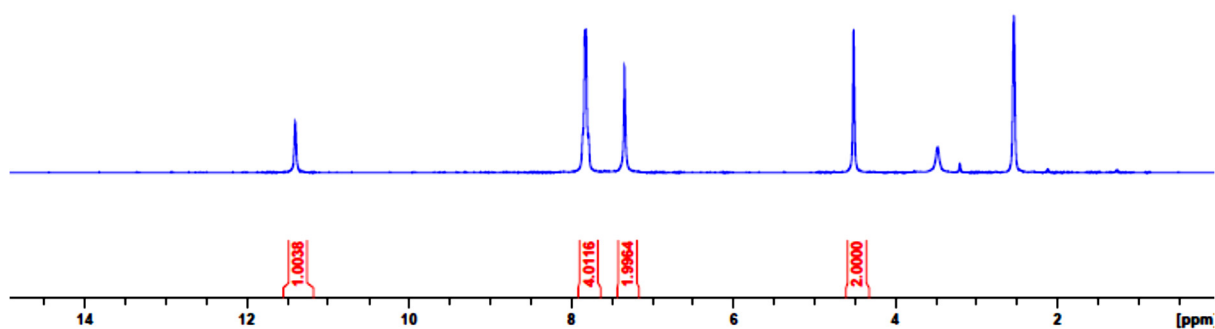

6

-171.1461

-155.9859

-141.9123

-139.2413

-127.6740

-118.4644

-51.9140

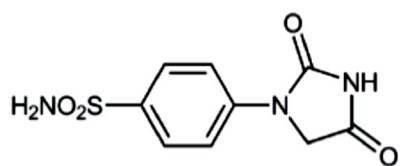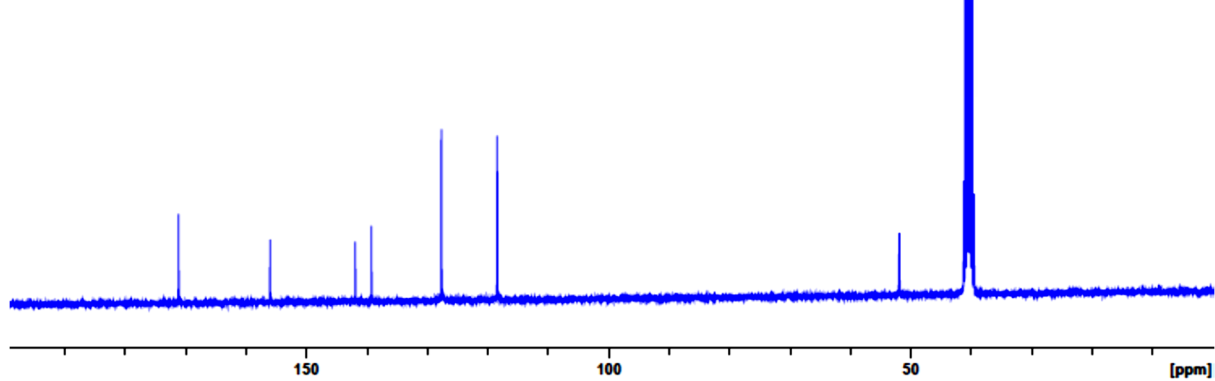

8a

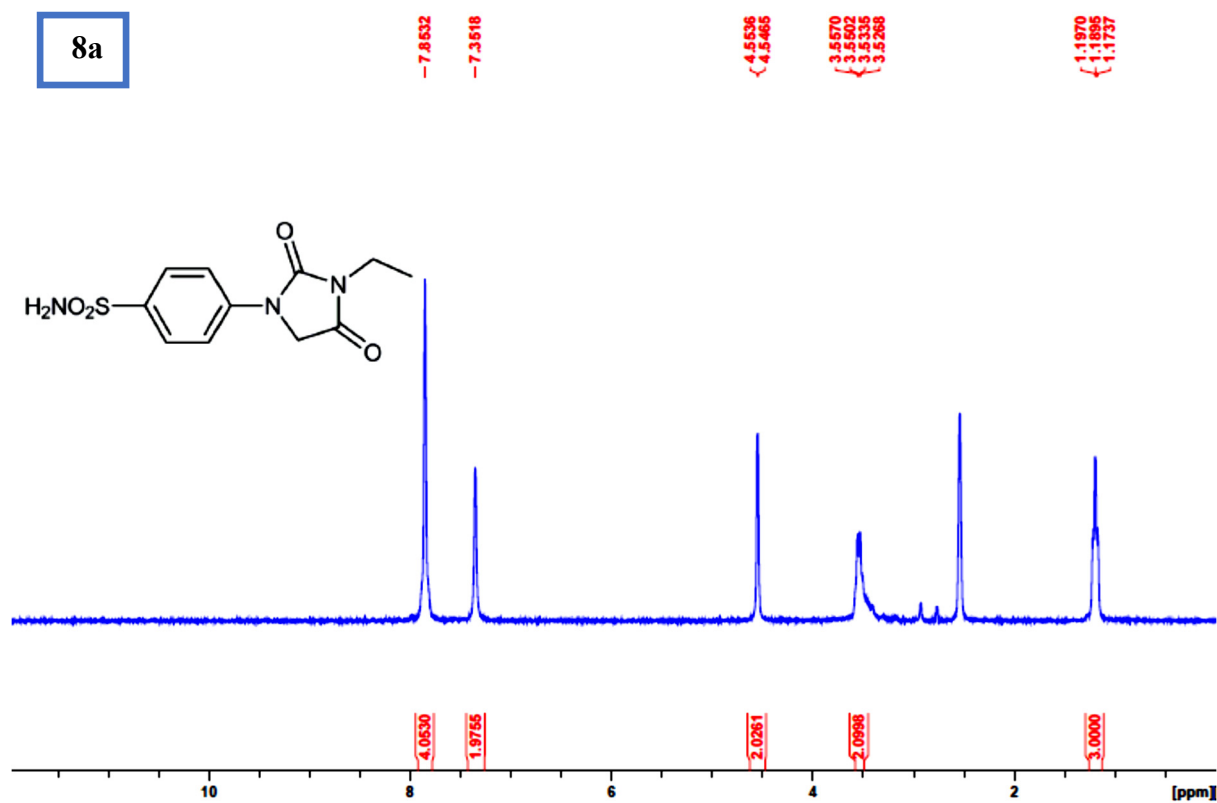

DMSO-D<sub>2</sub>O

8a

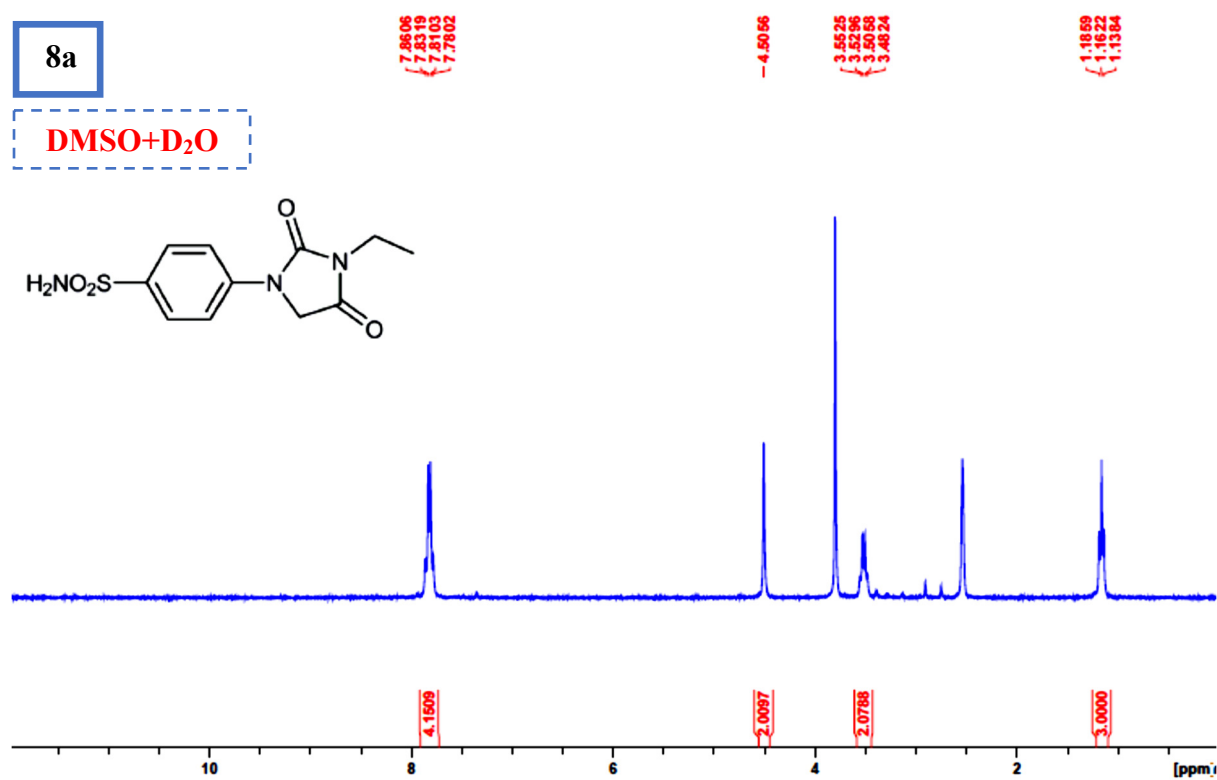

DMSO-D2O

8a

-170.1501  
 -164.1252  
 -155.6947  
 -142.1645  
 -139.5771  
 -128.2327  
 -119.0620

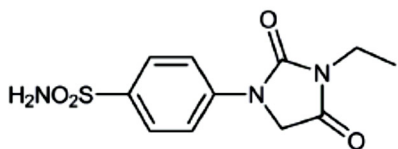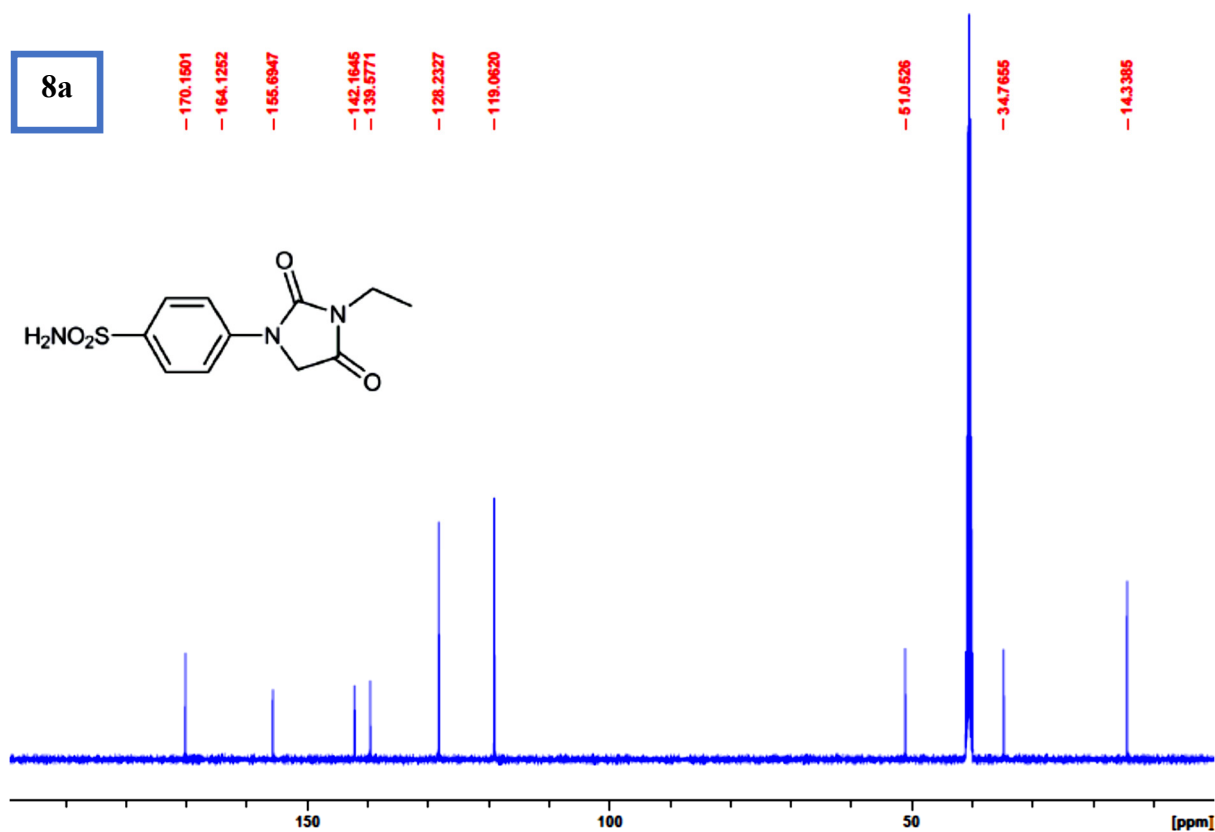

8b

7.8620  
 7.8452  
 7.8664  
 7.8488  
 4.5789  
 4.5617  
 3.5037  
 3.4856  
 1.6010  
 1.3129  
 0.9139  
 0.8969

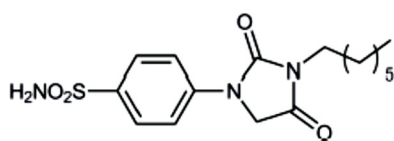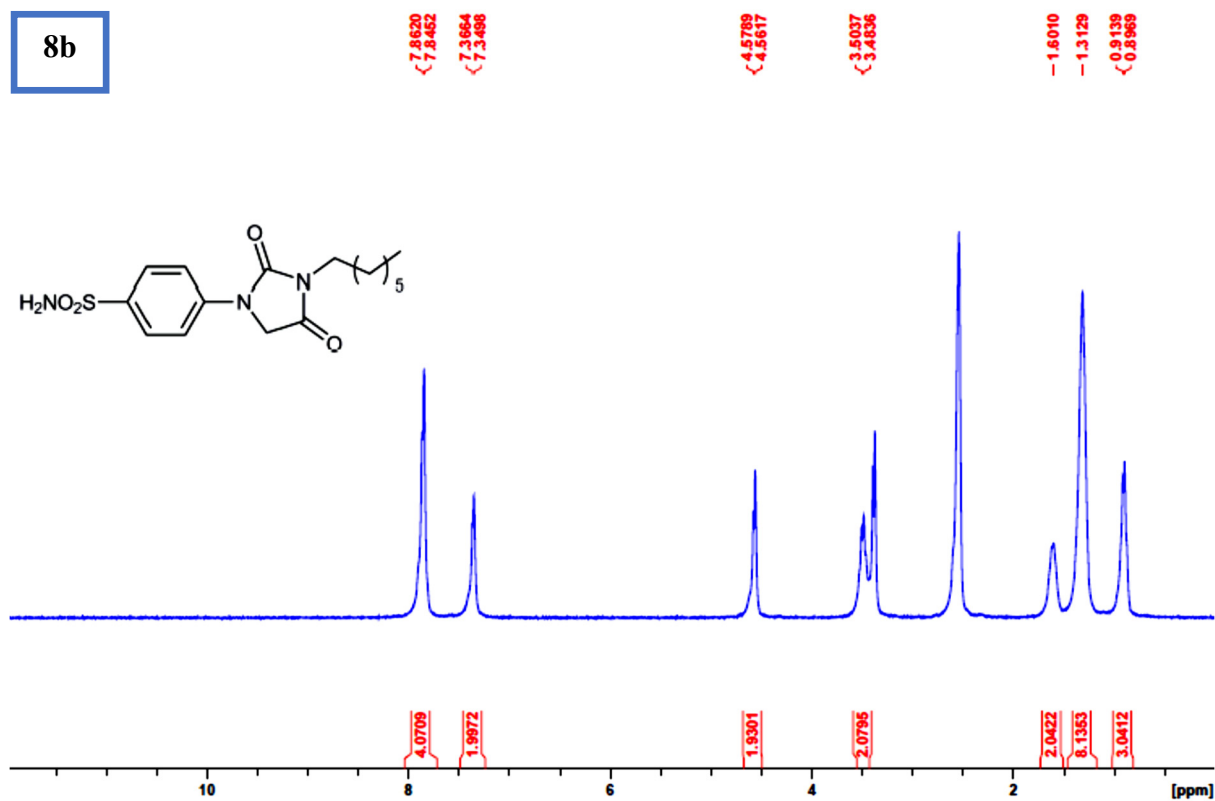

DMSO-D<sub>2</sub>O

8b

DMSO-D<sub>2</sub>O

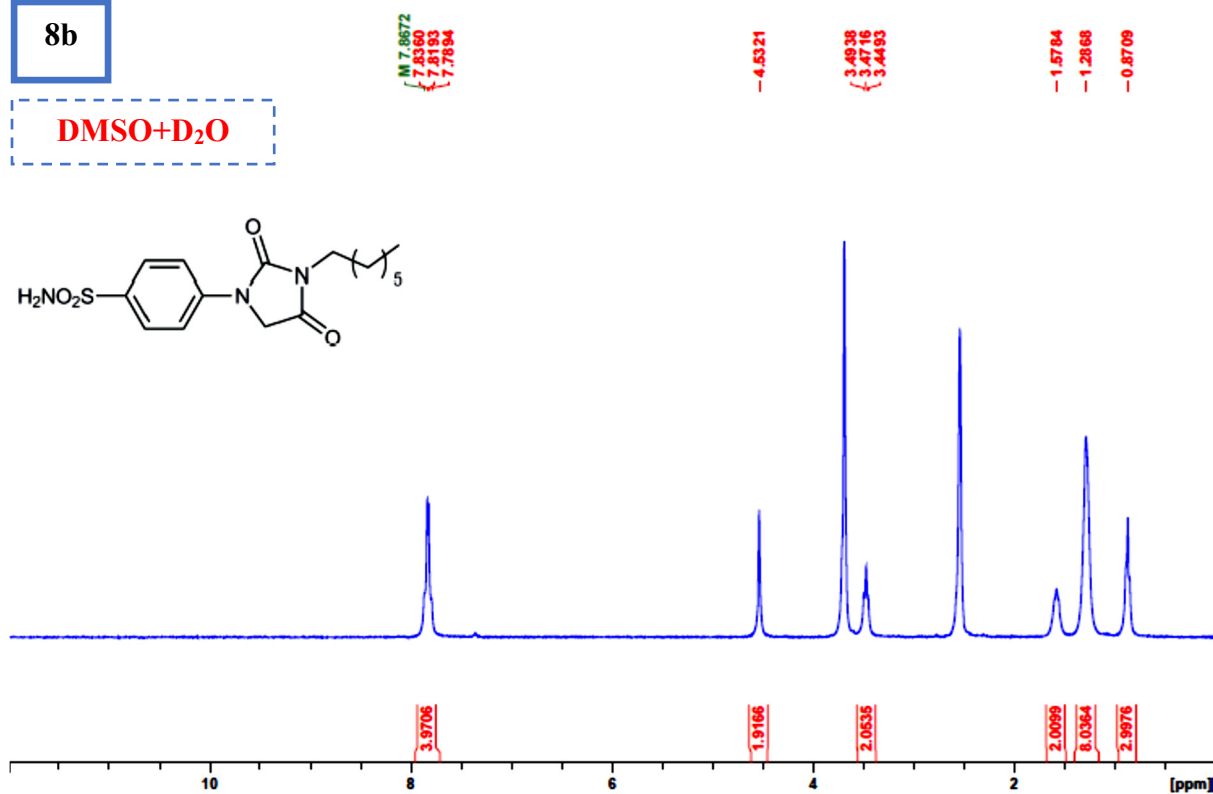

8b

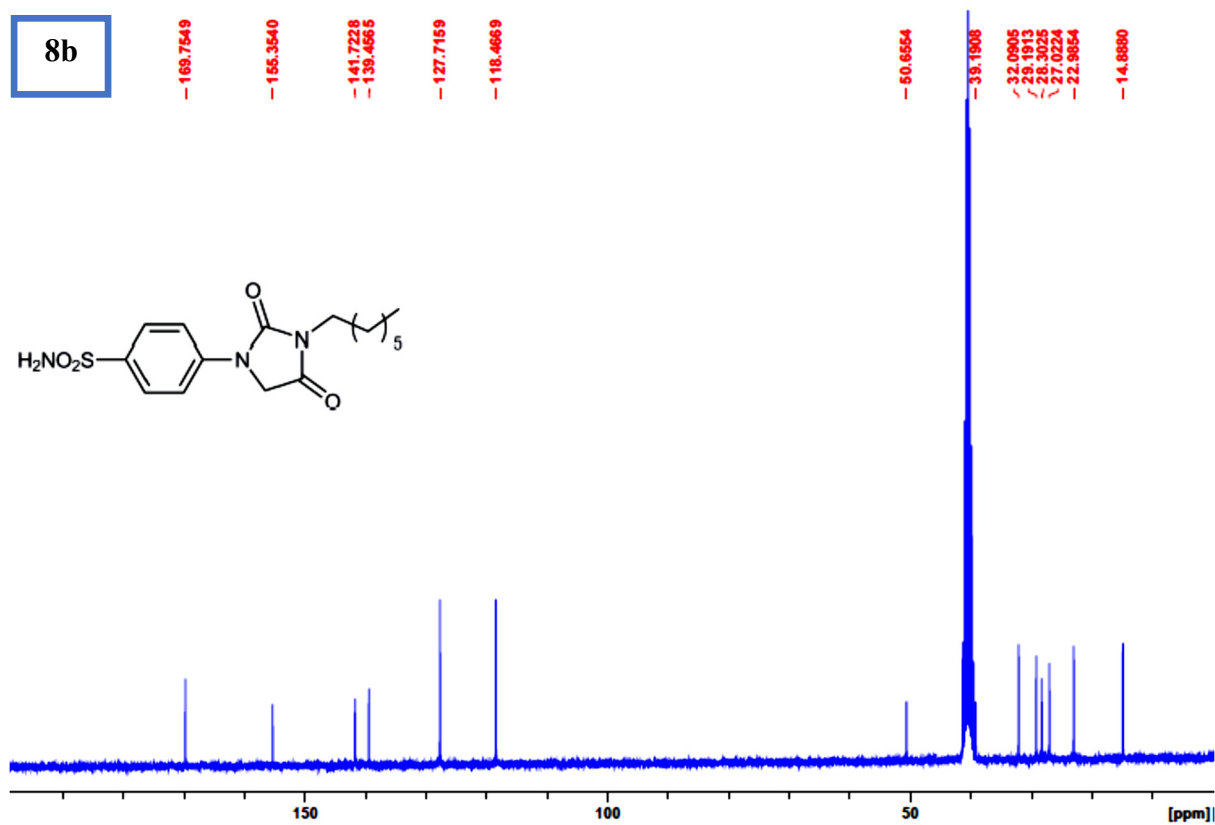

8c

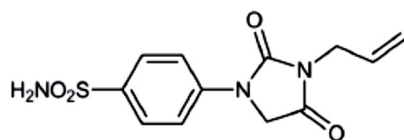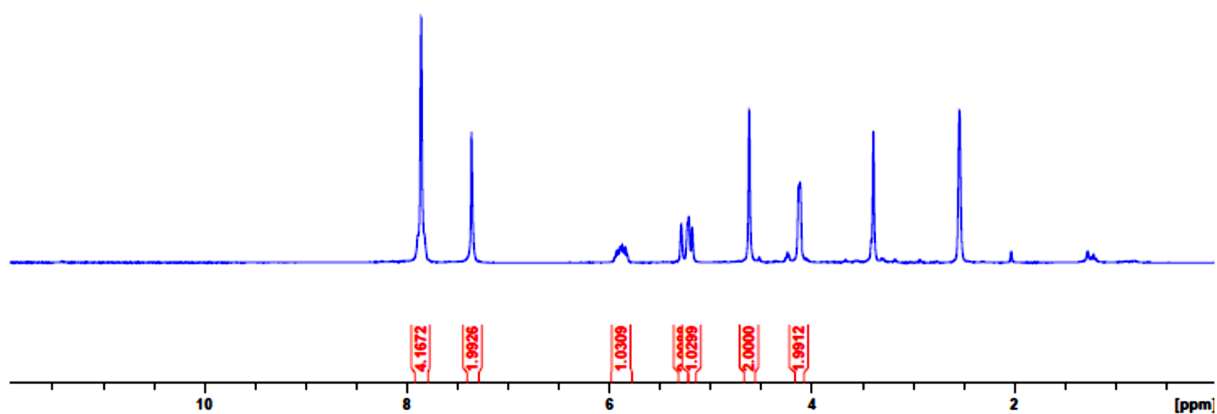

8c

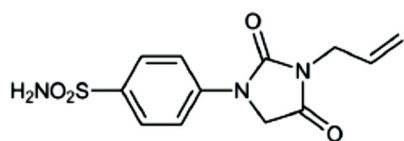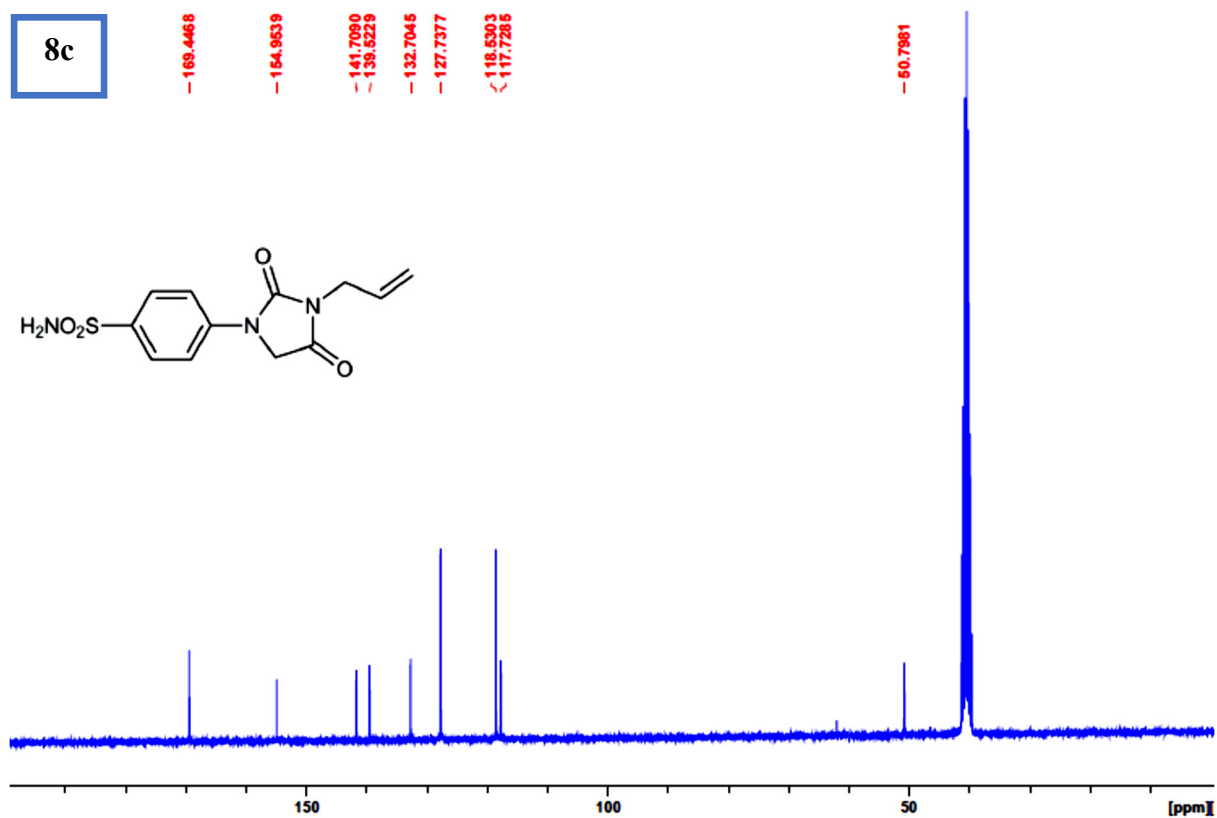

8d

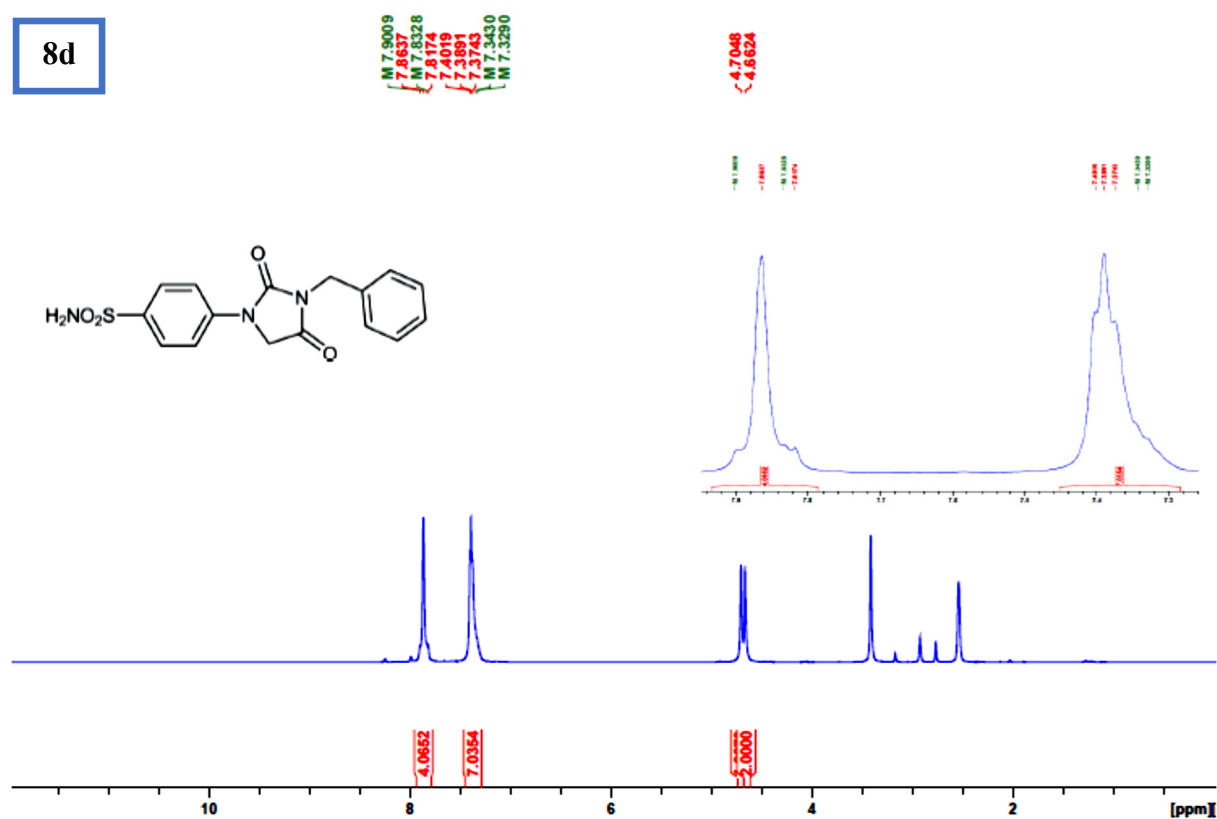

8d

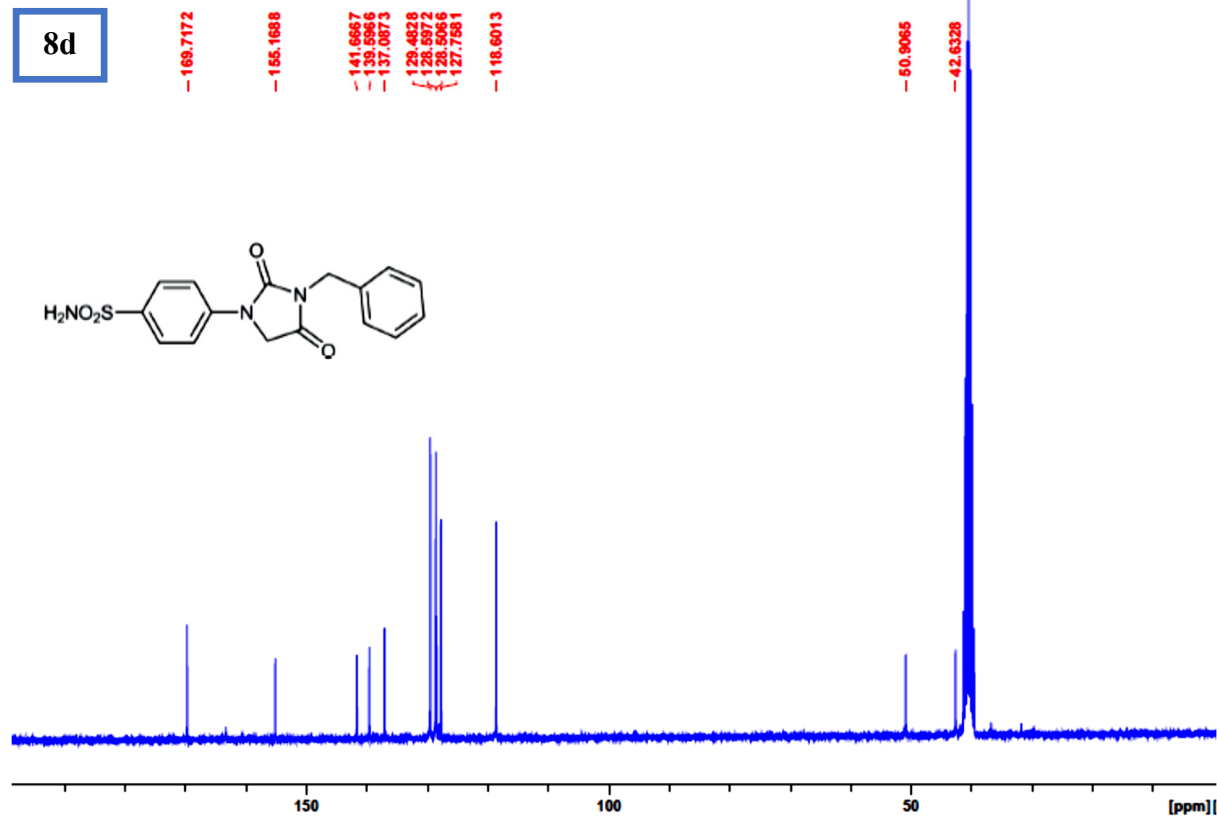

8e

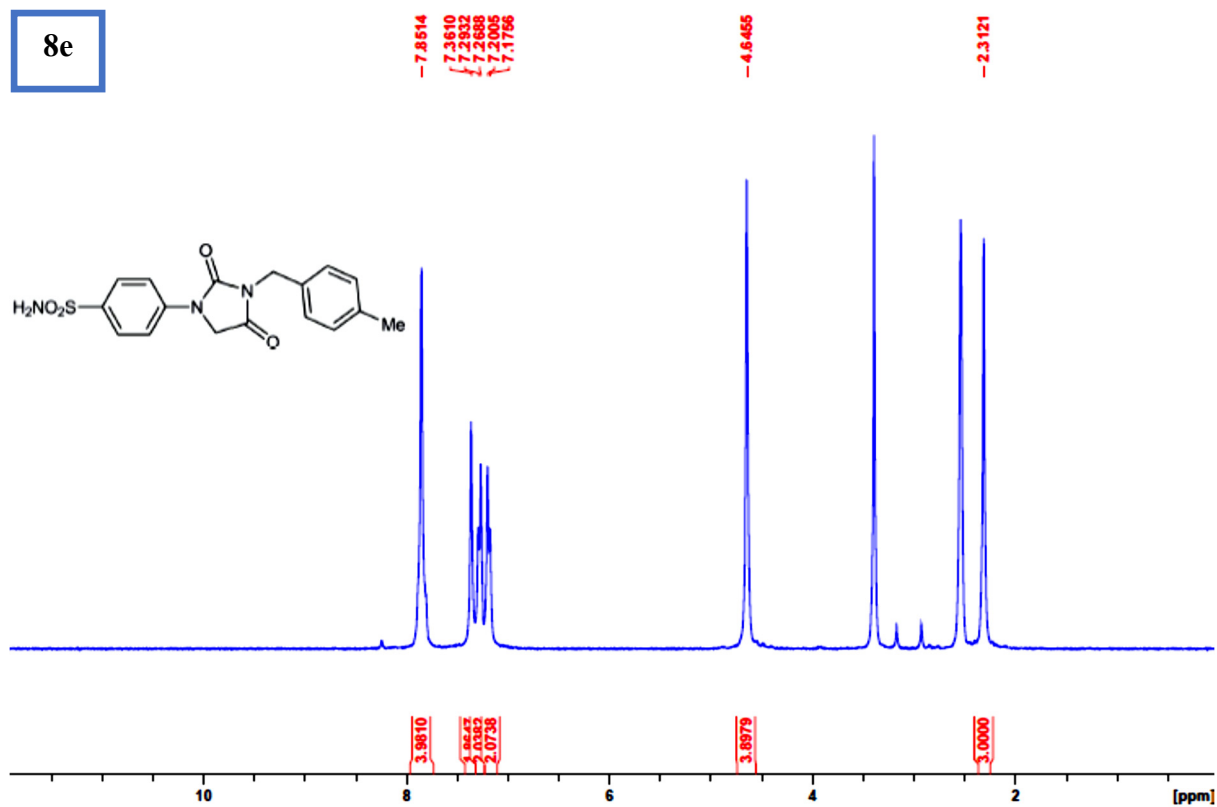

8e

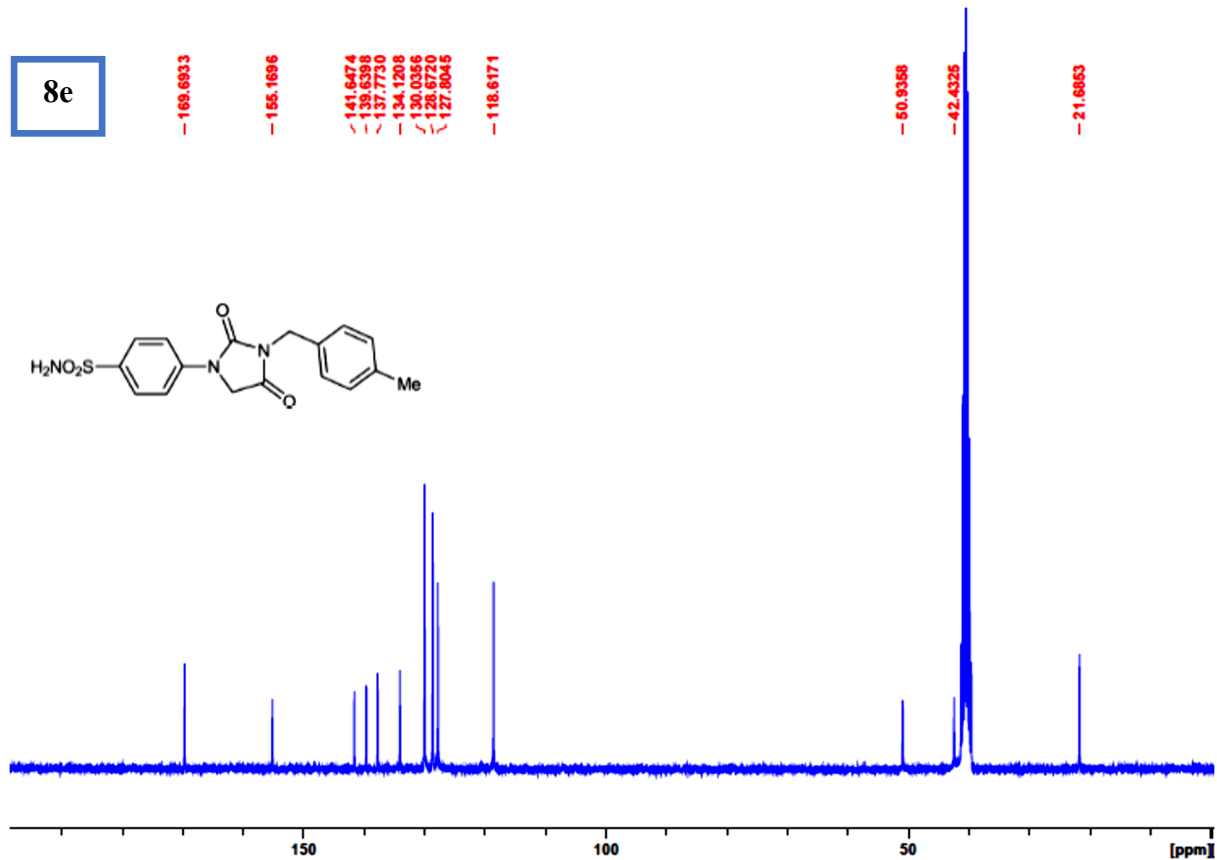



8f

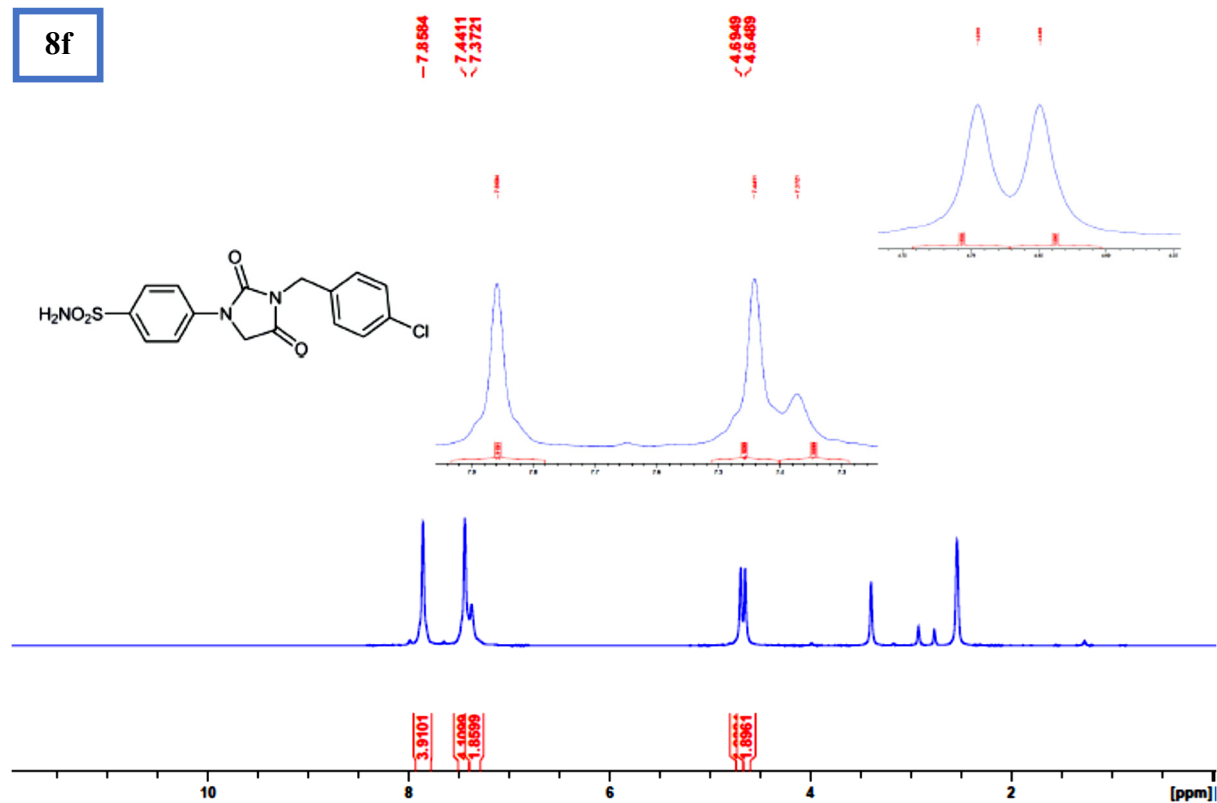

8f

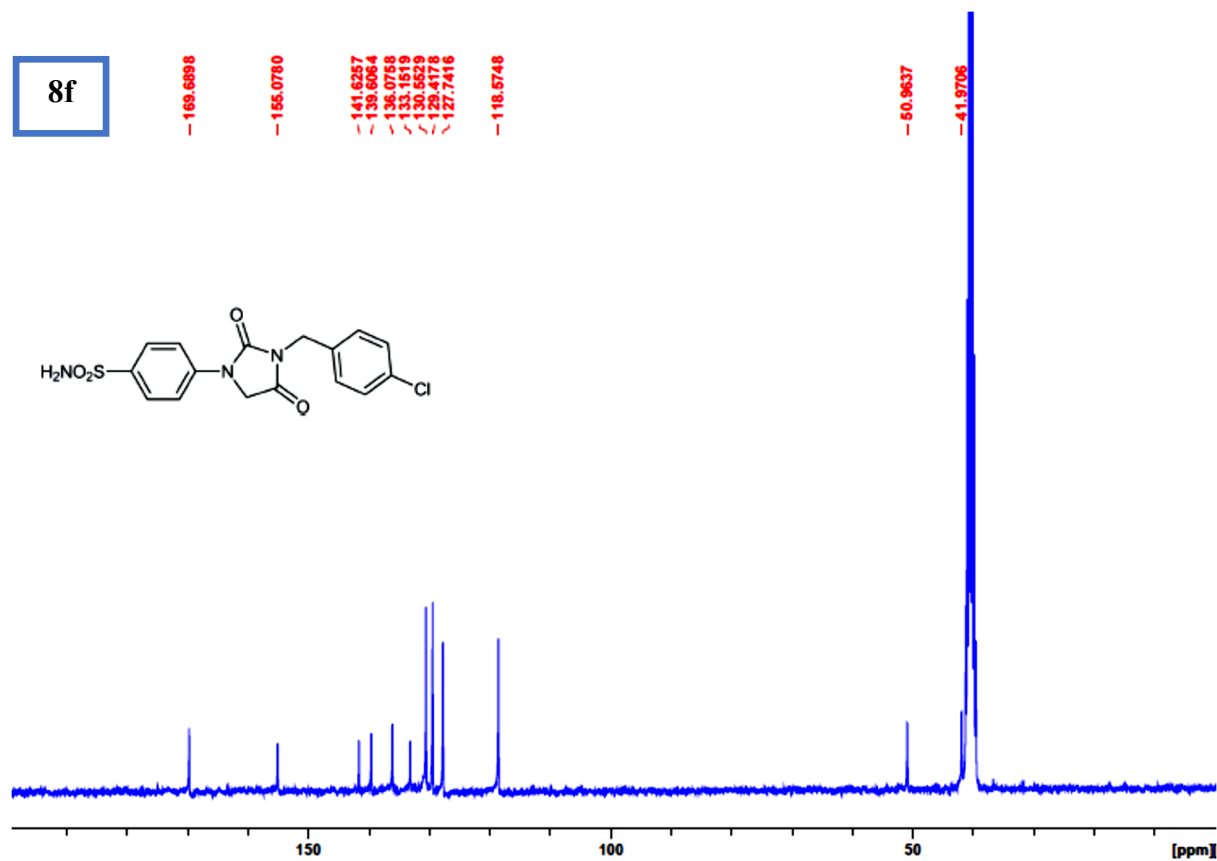

8g

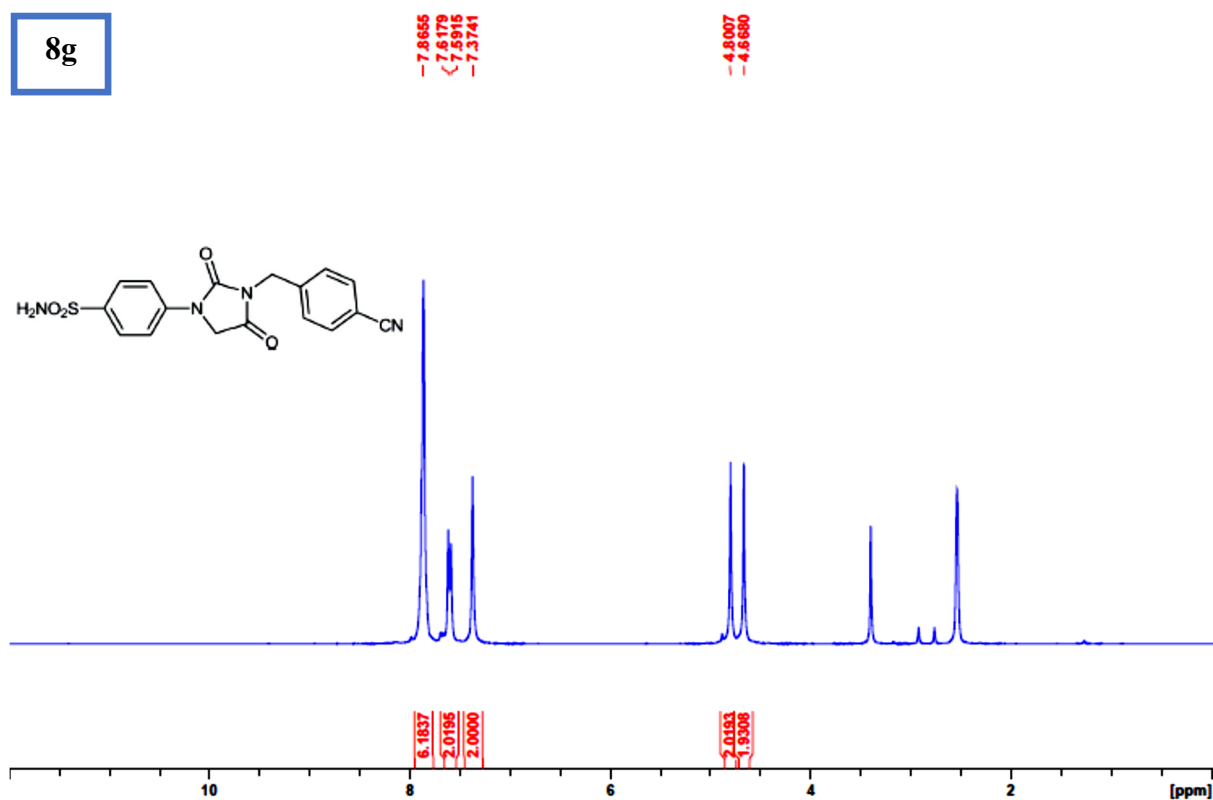

8g

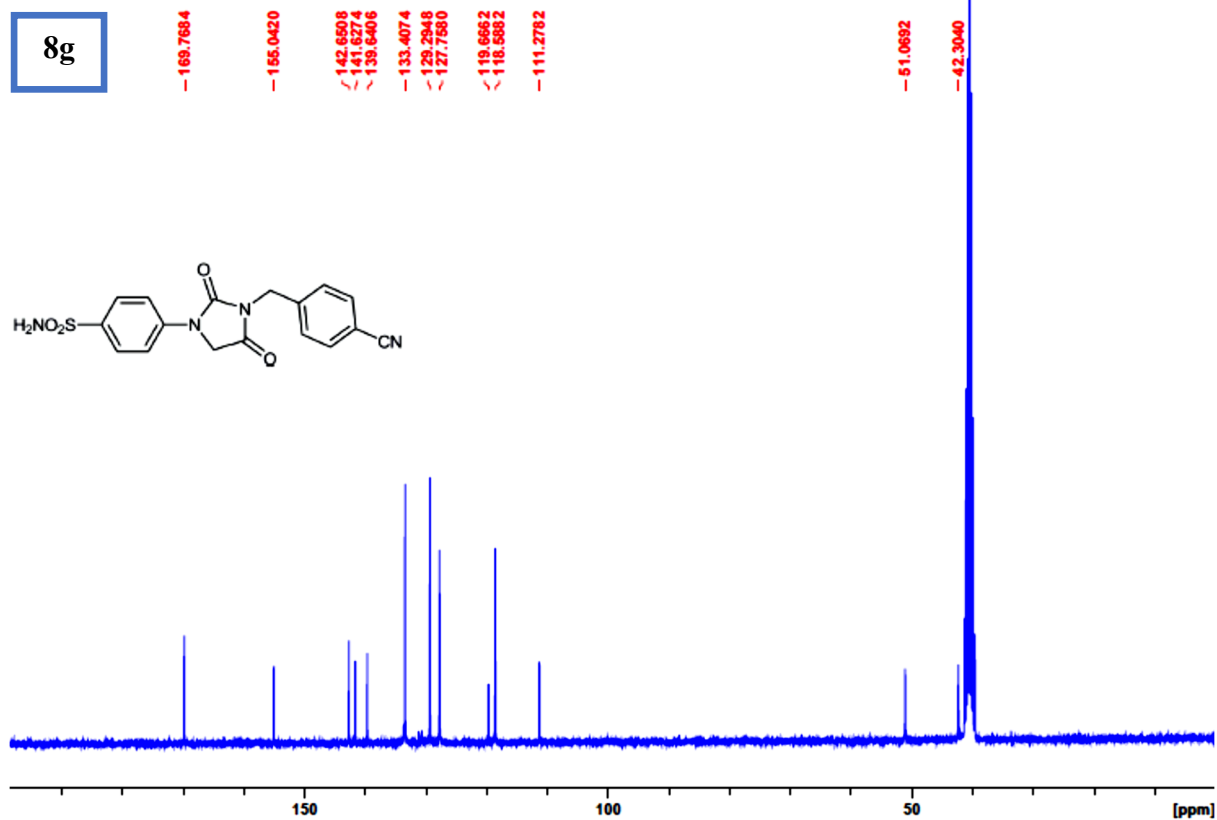

8h

8.2621  
8.2385  
7.8710  
7.5982  
7.5740  
7.3765

4.8504  
4.8765

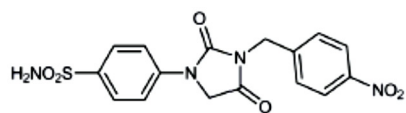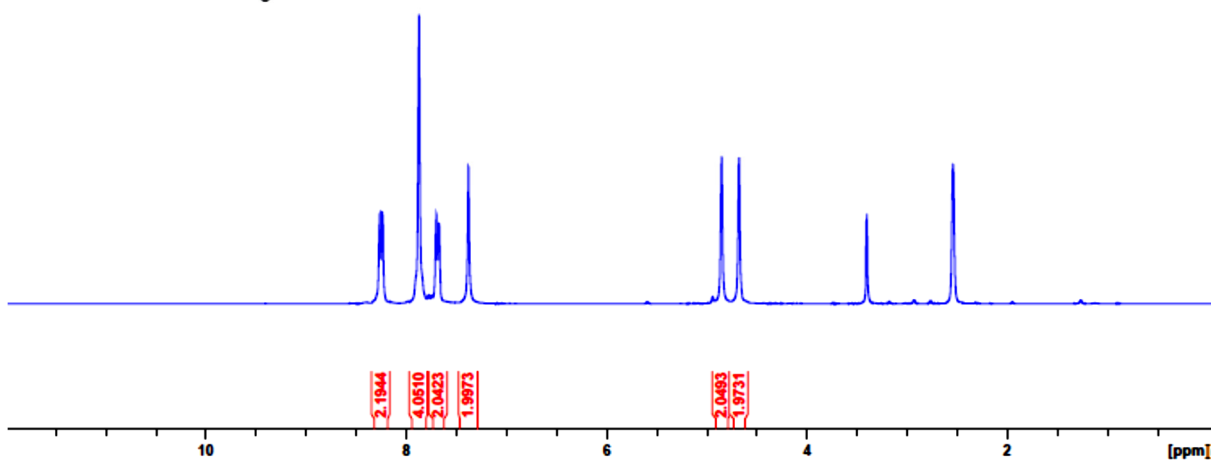

8h

169.7625  
155.0283  
147.8715  
144.7018  
141.5192  
139.5681  
129.6500  
127.7705  
124.5858  
118.5984

51.0918  
42.1285

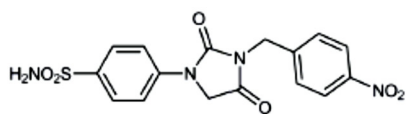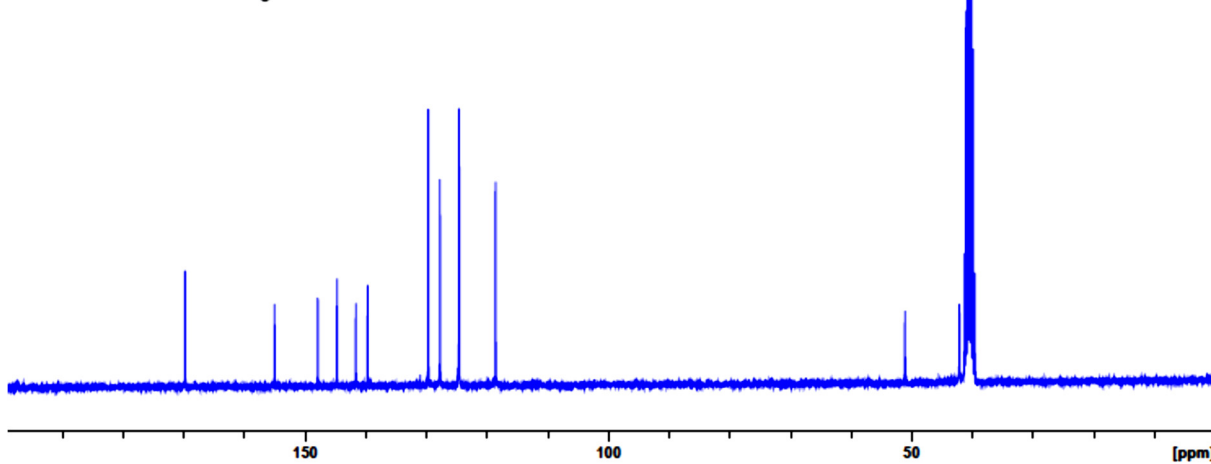

8i

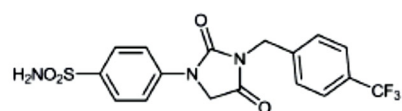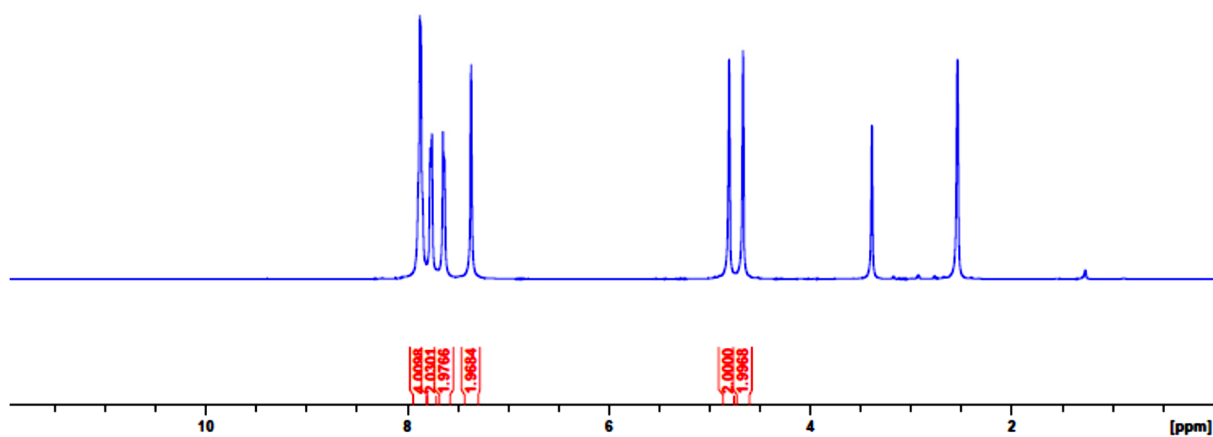

8i

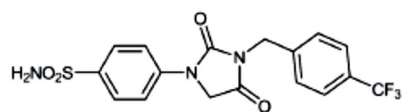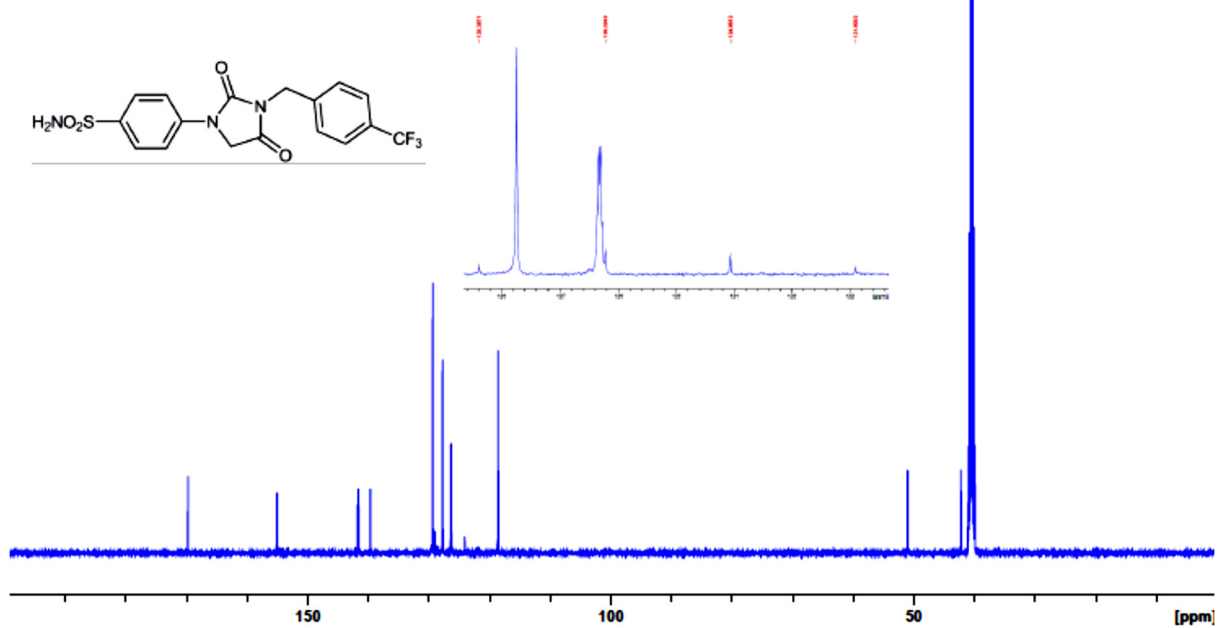

8i

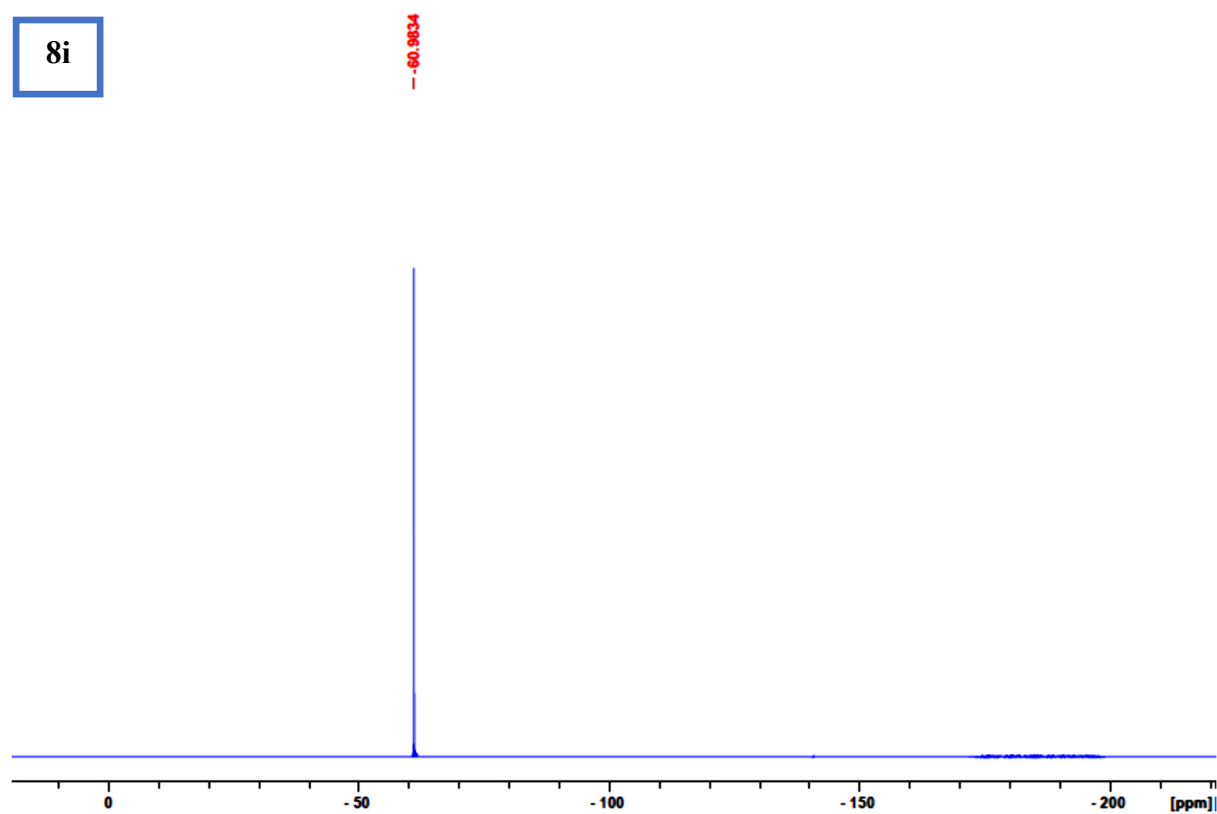

8j

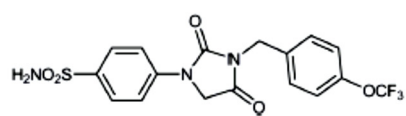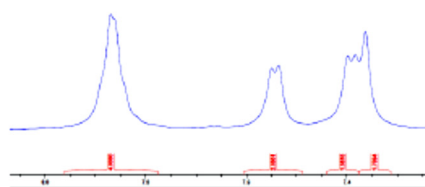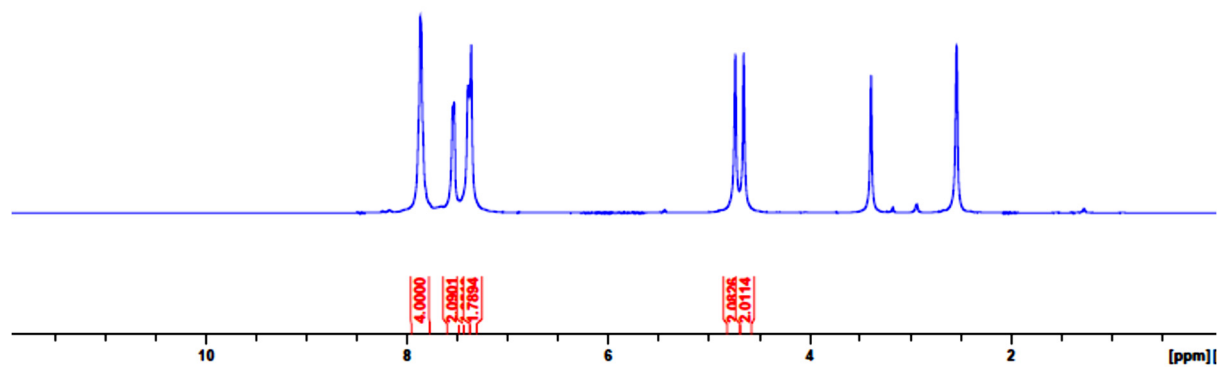

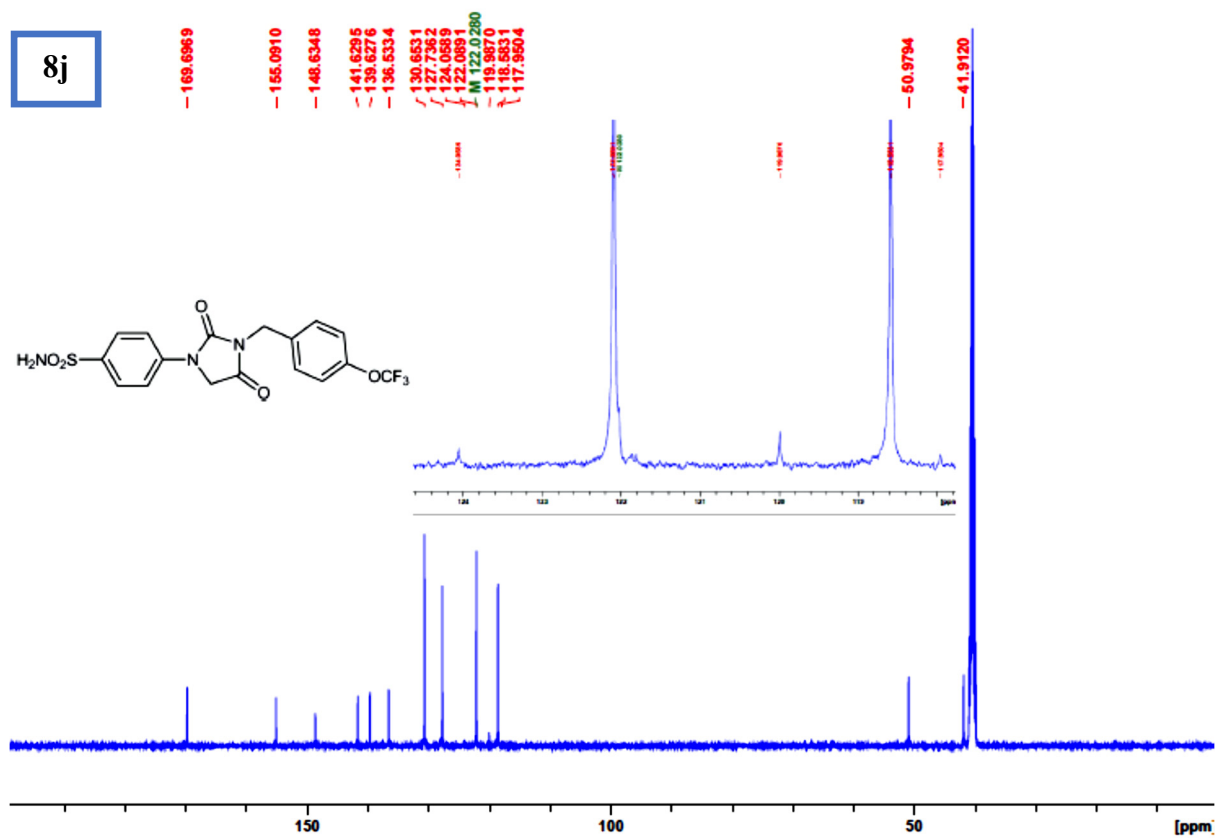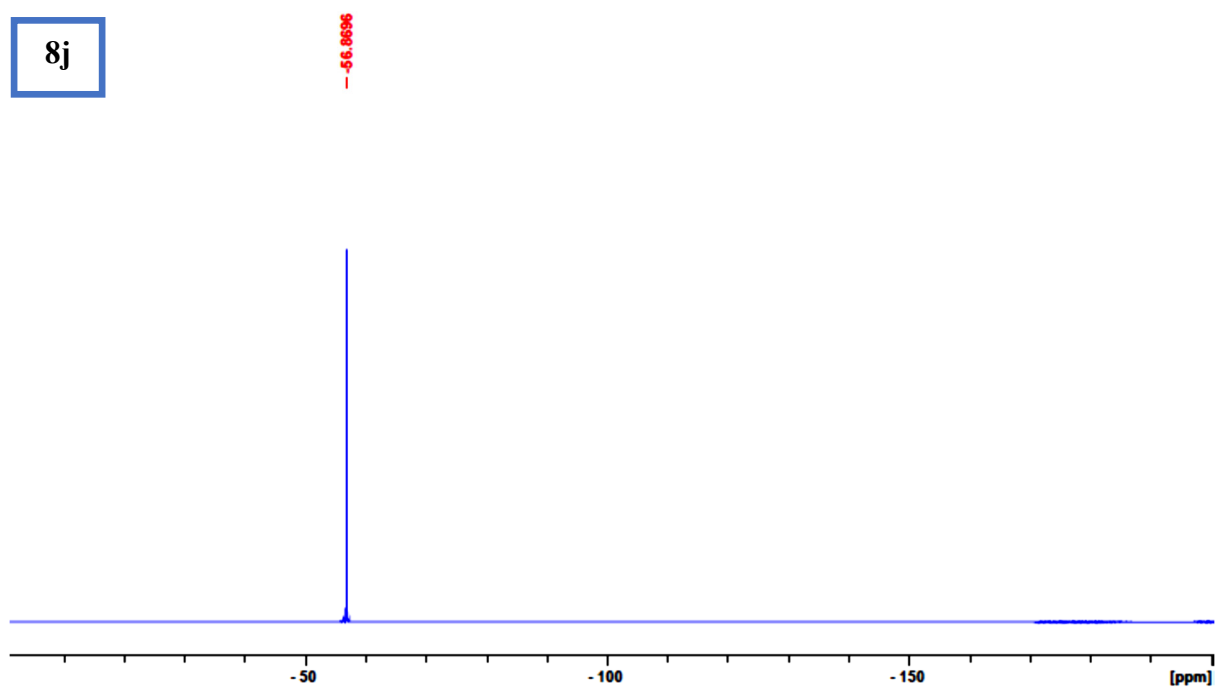

8k

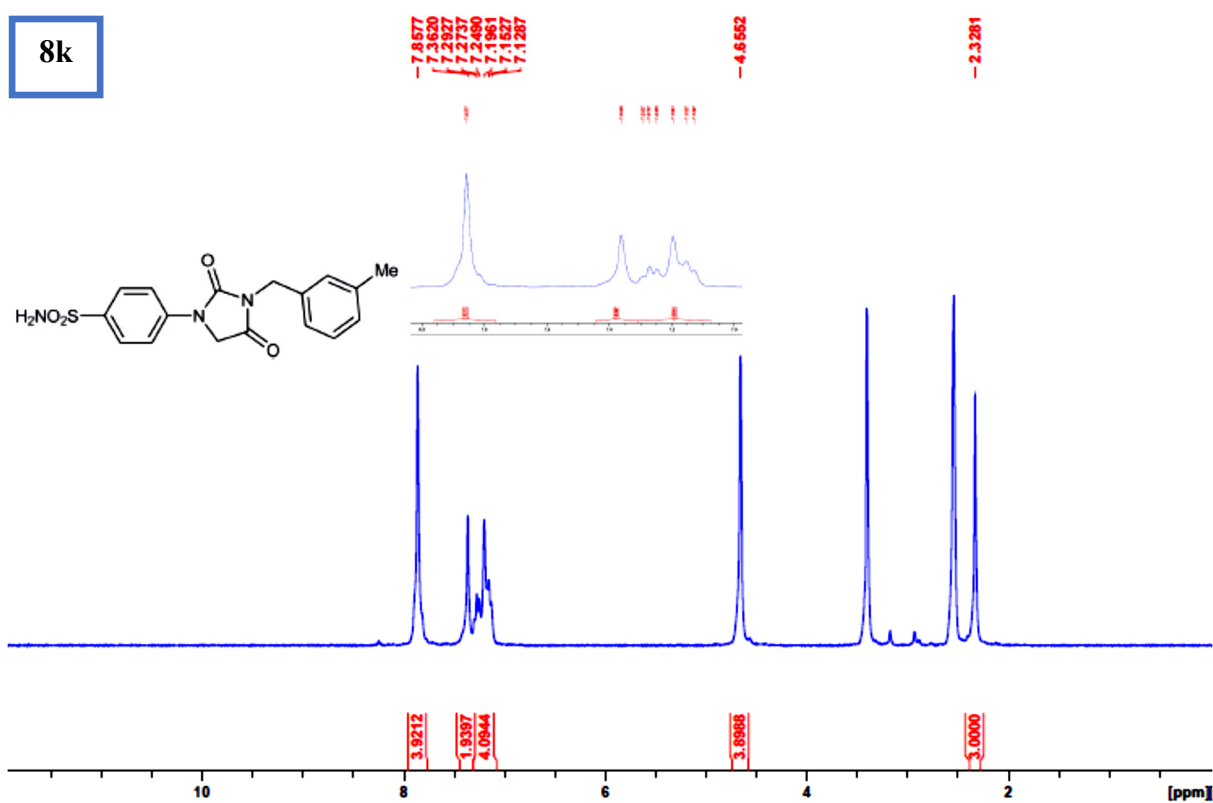

8k

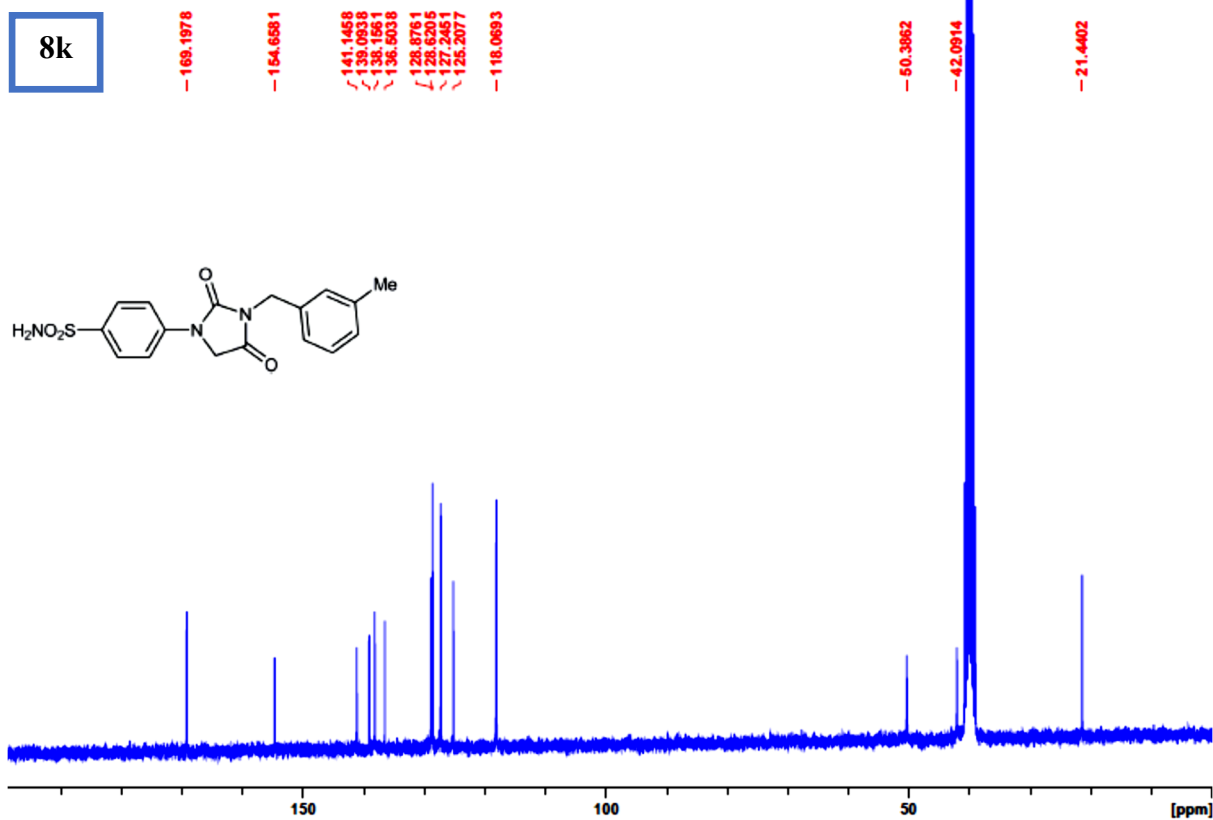

81

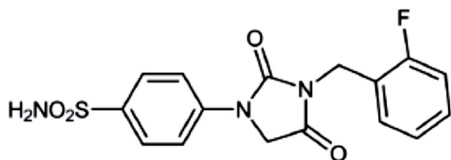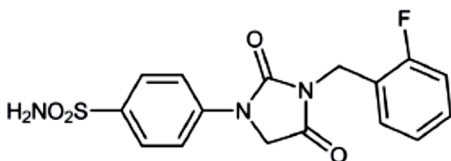



81

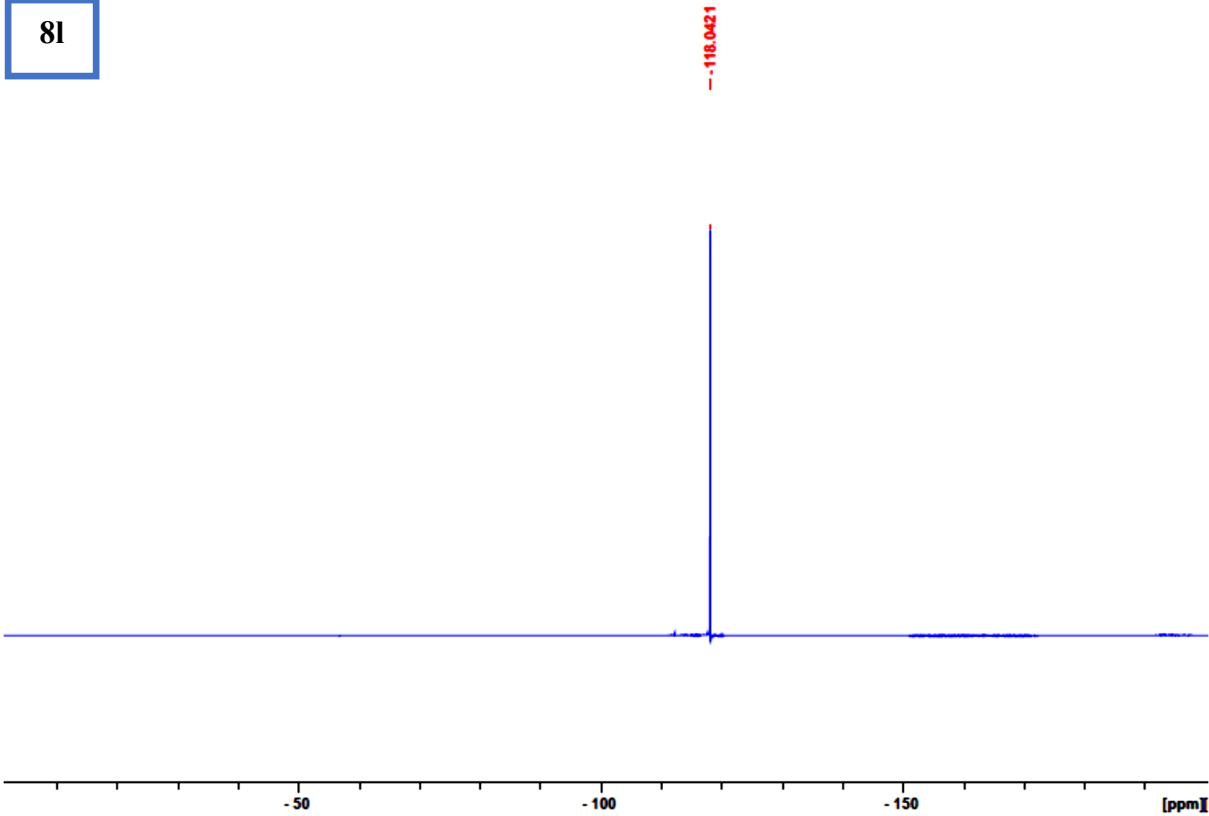

8m

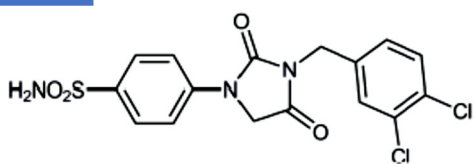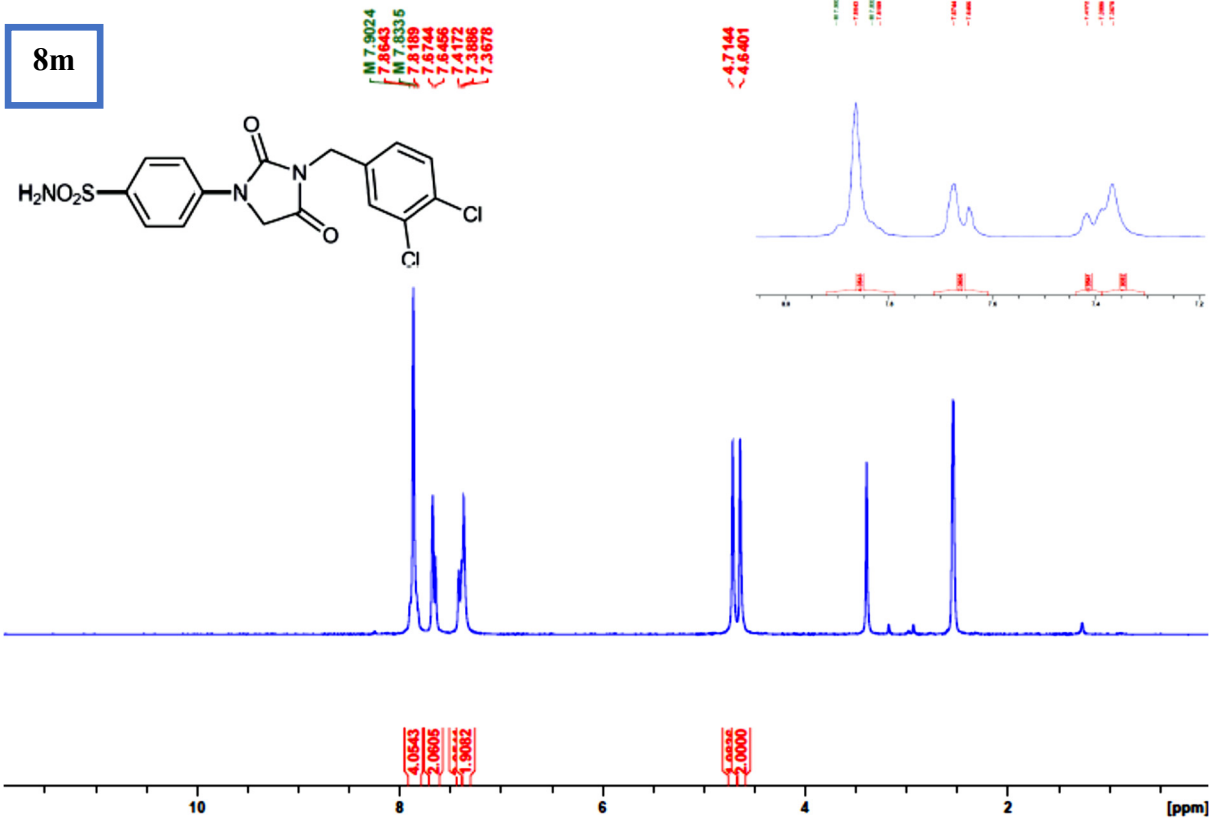

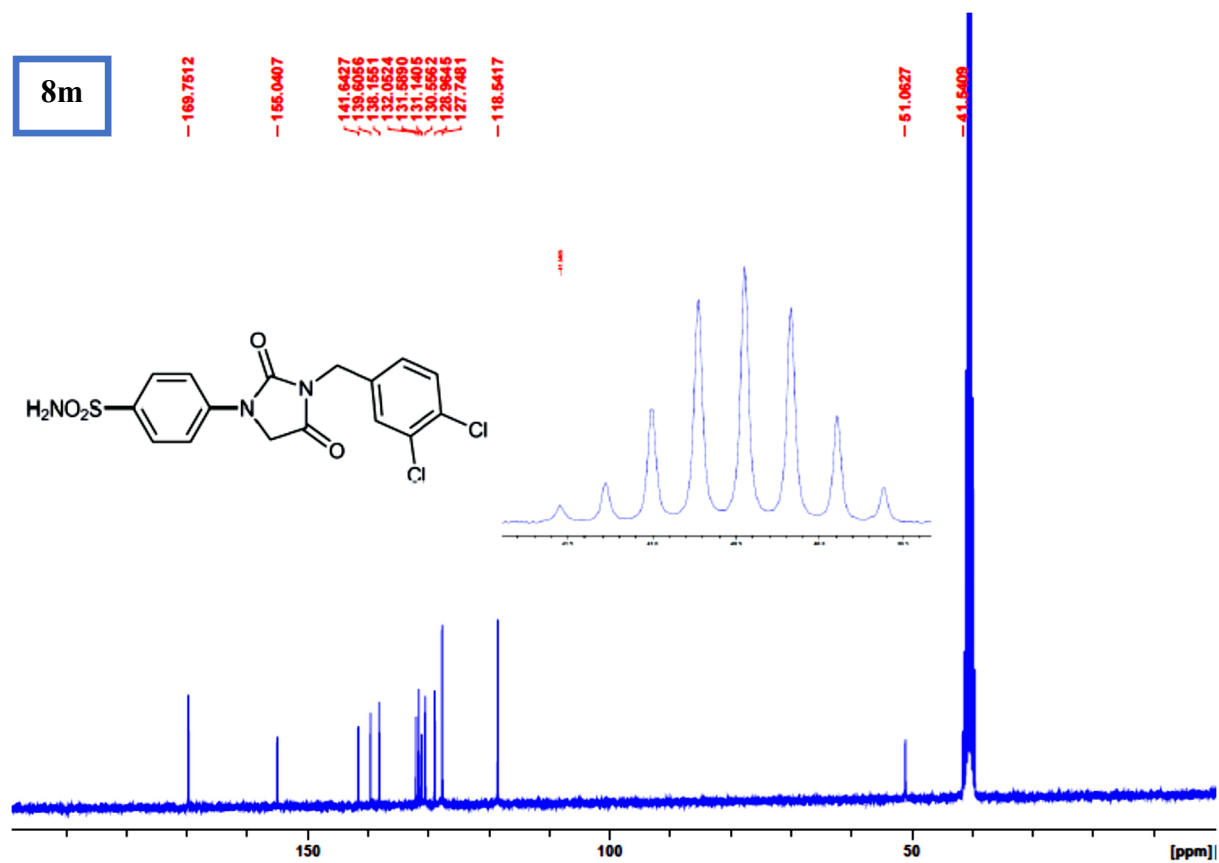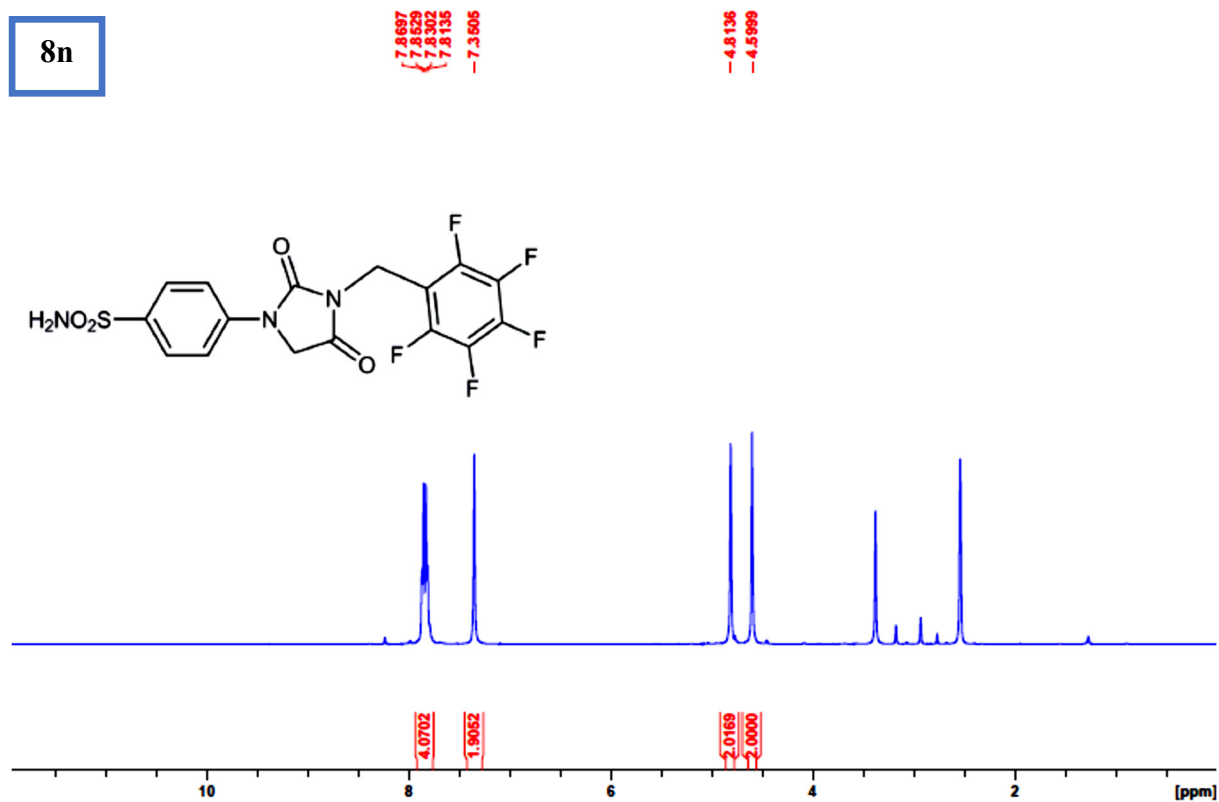

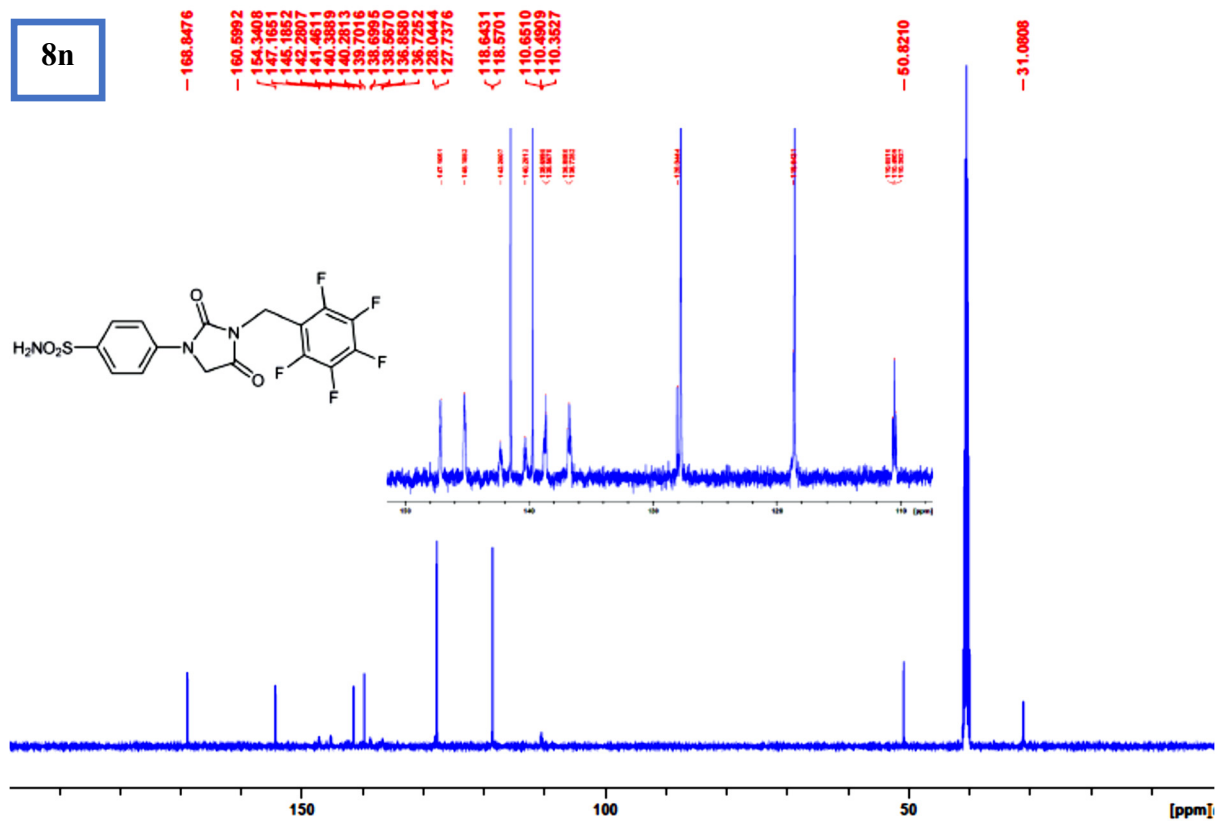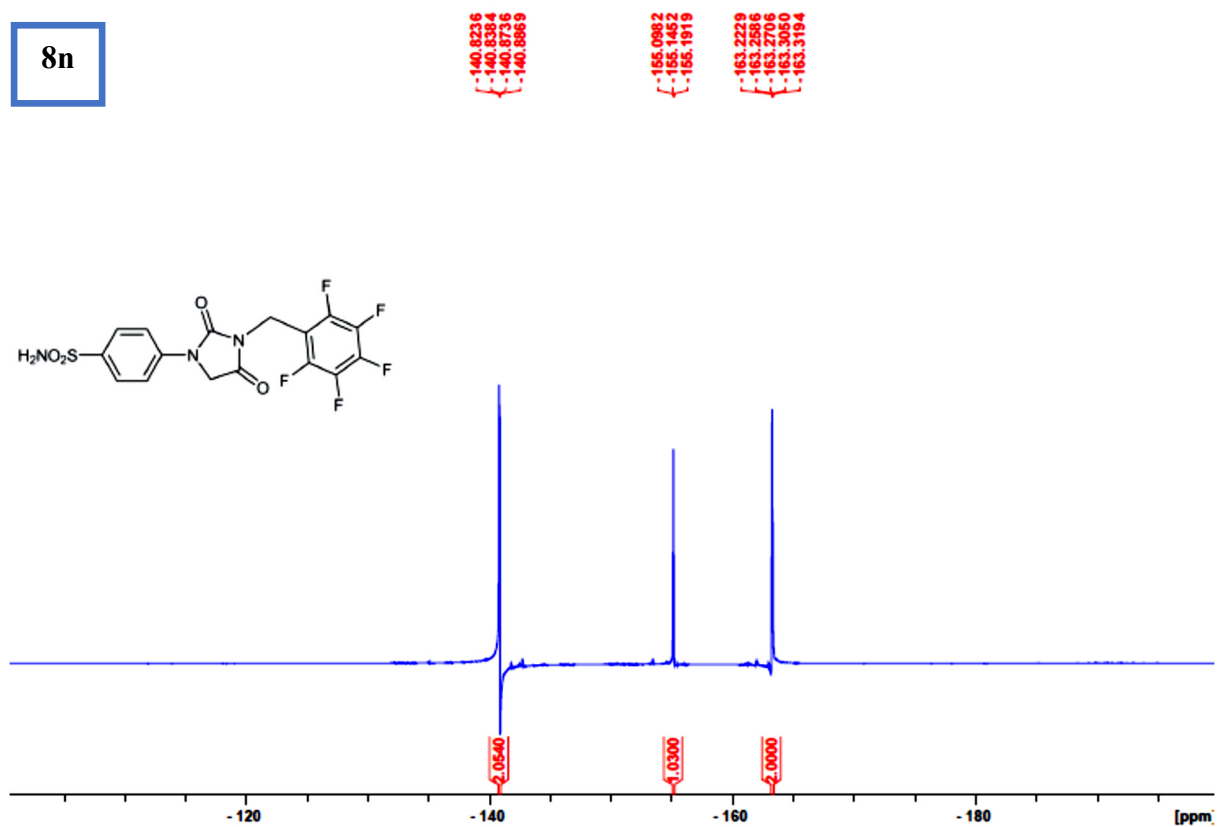

Supplement: s1 [file s1]
